1 **Calcium signaling mediates mechanotransduction at the**  
2 **multicellular stage of *Dictyostelium discoideum***

3

4 Hidenori Hashimura<sup>1,2,3,\*</sup>, Yusuke V. Morimoto<sup>2,4,5,\*‡</sup>, Yusei Hirayama<sup>4</sup> and  
5 Masahiro Ueda<sup>1,2,6</sup>

6

7 <sup>1</sup> Department of Biological Sciences, Graduate School of Science, Osaka  
8 University, 1-3 Yamadaoka, Suita, Osaka 565-0871, Japan.

9 <sup>2</sup> RIKEN Center for Biosystems Dynamics Research (BDR), 6-2-3 Furuedai, Suita,  
10 Osaka 565-0874, Japan.

11 <sup>3</sup> Graduate School of Arts and Sciences, University of Tokyo, 3-8-1 Komaba,  
12 Meguro, Tokyo 153-8902, Japan.

13 <sup>4</sup> Faculty of Computer Science and Systems Engineering, Kyushu Institute of  
14 Technology, 680-4 Kawazu, Iizuka, Fukuoka 820-8502, Japan.

15 <sup>5</sup> Japan Science and Technology Agency, PRESTO, 4-1-8 Honcho, Kawaguchi,  
16 Saitama, 332-0012, Japan

17 <sup>6</sup> Graduate School of Frontier Biosciences, Osaka University, 1-3 Yamadaoka,  
18 Suita, Osaka 565-0871, Japan.

19

20 \* These authors contributed equally.

21 ‡ Corresponding author: e-mail: [yvm001@phys.kyutech.ac.jp](mailto:yvm001@phys.kyutech.ac.jp)

22

23 Running title: Mechanotransduction in *Dictyostelium* multicellular body

24

25 Keywords: mechanotransduction; calcium signaling; ion channel; multicellular  
26 system; *Dictyostelium*

27

## 28 **Summary statement**

29 Fluorescence imaging revealed that calcium signaling via both endoplasmic  
30 reticulum and extracellular pathways plays an important role in mechanosensing  
31 during the multicellular stage of *Dictyostelium*.

32

## 33 **Abstract**

34 Calcium acts as a second messenger and regulates cellular functions, including  
35 cell motility. In *Dictyostelium discoideum*, the cytosolic calcium level oscillates  
36 synchronously, and calcium signal waves propagate in the cell population during  
37 the early stages of development, including aggregation. At the unicellular phase,  
38 the calcium response through Piezo channels also functions in mechanosensing.  
39 However, calcium signaling dynamics during multicellular morphogenesis is still  
40 unclear. Here, live-imaging of cytosolic calcium levels revealed that calcium wave  
41 propagation, depending on cAMP relay, temporarily disappeared at the onset of  
42 multicellular body formation. Alternatively, the occasional burst of calcium signals  
43 and their propagation were observed in both anterior and posterior regions of  
44 migrating multicellular bodies. Calcium signaling in multicellular bodies occurred  
45 in response to mechanical stimulation. Both pathways, calcium release from the  
46 endoplasmic reticulum via IP3 receptor and calcium influx from outside the cell,  
47 were involved in calcium waves induced by mechanical stimuli. These show that  
48 calcium signaling works on mechanosensing in both the unicellular and  
49 multicellular phases of *Dictyostelium* using different molecular mechanisms  
50 during development.

51

## 52 **Introduction**

53  $\text{Ca}^{2+}$  signals are essential for several types of biological activities (Clapham,  
54 2007; Parekh, 2011). In multicellular organisms, the synchronized elevation of  
55 intracellular  $\text{Ca}^{2+}$  levels ( $[\text{Ca}^{2+}]_i$ ) occurs in cell populations, and this “[ $\text{Ca}^{2+}$ ]<sub>i</sub> burst”  
56 propagates as waves among cells (Berridge et al., 2003; Leybaert and Sanderson,  
57 2012). This phenomenon has been reported in various cell types and biological  
58 activities, such as fertilization in eggs and wound repair of endothelial cells  
59 (Chifflet et al., 2012; Whitaker, 2006). [ $\text{Ca}^{2+}$ ]<sub>i</sub> burst and wave propagation play key  
60 roles in orchestrating multiple cells *in vivo* and *in vitro* (Parekh, 2011). Cell-cell  
61 communication via  $\text{Ca}^{2+}$  signaling has been well investigated in animals, and it  
62 has revealed that  $\text{Ca}^{2+}$  waves are propagated by gap junction communication, or  
63 paracrine signaling (Leybaert and Sanderson, 2012). A factor evoking the [ $\text{Ca}^{2+}$ ]<sub>i</sub>  
64 burst is a mechanical stimulus, and transduction of mechanical stimuli into  $\text{Ca}^{2+}$   
65 signals is mediated by varied  $\text{Ca}^{2+}$  channels such as inositol trisphosphate (IP3)  
66 receptors, transient receptor potential (TRP) channels, and the stretch-activated  
67 ion channel Piezo (Canales et al., 2019; Coste et al., 2010; Fang et al., 2021;  
68 Prole and Taylor, 2019; Volkens et al., 2015; Yin and Kuebler, 2010). These  
69 channels are broadly conserved in eukaryotes including animals, plants, and  
70 amoebae (Coste et al., 2010; Volkens et al., 2015; Yin and Kuebler, 2010). Hence,  
71 there is a possibility that  $\text{Ca}^{2+}$  signaling is universally employed in various  
72 organisms for mechanosensing.

73

74 One example of  $\text{Ca}^{2+}$  wave propagation among populations of eukaryotic cells is  
75 cell-cell communication in the aggregation of social amoebae, *Dictyostelium*

76 *discoideum*. Following starvation, *Dictyostelium* cells aggregate and form cell  
77 masses called mounds. Cells in a mound differentiate into either a prestalk or  
78 prespore cells and form migrating multicellular bodies called slugs. During  
79 aggregation, intercellular cAMP signaling, known as cAMP, relay organizes  
80 directed migration of cells (Gregor et al., 2010; Hashimura et al., 2019; Tomchik  
81 and Devreotes, 1981), and  $Ca^{2+}$  waves are propagated simultaneously among  
82 starved cells (Horikawa et al., 2010). It has been assumed that cAMP relay is  
83 essential for the coordination of collective cell migration through *Dictyostelium*  
84 development (Singer et al., 2019; Weijer, 1999); however, recent studies have  
85 shown that the dynamics of cAMP signaling shows transition after multicellular  
86 formation (Fujimori et al., 2019; Hashimura et al., 2019). In addition to  $Ca^{2+}$  wave  
87 propagation during aggregation (Horikawa et al., 2010), transient  $[Ca^{2+}]_i$  elevation  
88 has been observed in mounds and slugs (Cubitt et al., 1995). These results  
89 suggest that  $[Ca^{2+}]_i$  signaling such as synchronous  $[Ca^{2+}]_i$  burst and wave  
90 propagation occurs not only during aggregation but also in the latter development  
91 stages of *Dictyostelium* cells, including mounds and slugs. However, the  
92 dynamics and molecular mechanisms of  $[Ca^{2+}]_i$  signaling during the  
93 morphogenesis of *Dictyostelium* are still unclear.

94

95 In this study, the  $[Ca^{2+}]_i$  signaling through the development of *Dictyostelium* cells  
96 was investigated. This approach revealed the transition of  $[Ca^{2+}]_i$  signaling  
97 dynamics during the multicellular formation and the multicellular bodies of  
98 *Dictyostelium* have robust calcium signaling mechanisms in response to  
99 mechanical stimuli.

## 100 **Results**

### 101 **Transition of calcium signaling dynamics in cell populations during the** 102 **development of *Dictyostelium* cells**

103 To investigate the relationship between the dynamics of calcium signals and  
104 multicellular formation in *Dictyostelium*, we monitored  $[Ca^{2+}]_i$  dynamics during  
105 development with genetically-encoded calcium indicators (GECI). As previously  
106 reported (Horikawa et al., 2010), cells expressing the Förster resonance energy  
107 transfer (FRET) sensor YC-Nano15 (Kd = 15 nM) showed clear oscillations and  
108 wave propagation of fluorescence signals in aggregation streams (Fig. 1A, Fig.  
109 S1A, and Movie 1). Moreover,  $[Ca^{2+}]_i$  dynamics was also investigated with the  
110 single-wavelength GECI, GCaMP6s (Chen et al., 2013; Pervin et al., 2018), to  
111 confirm whether the wave propagation of fluorescence signals of YC-Nano15  
112 authentically reflected the  $[Ca^{2+}]_i$  dynamics during development using the other  
113 GECI and avoiding the phototoxicity caused by exposure of violet-blue light  
114 excitation for YC-Nano15. In starved *Dictyostelium* cells,  $[Ca^{2+}]_i$  transiently  
115 increases in response to external cAMP (Yumura et al., 1996) and the calcium  
116 channel *IpIA*, which is the homologue of IP3 receptor, is essential for its elevation  
117 (Traynor et al., 2000). When chemotactic-competent cells expressing GCaMP6s  
118 were stimulated by cAMP, wild-type cells showed transient rapid elevation of  
119 fluorescence signals with a peak at 16 s after stimulation; however, cells lacking  
120 *ipIA* show no increase of signals after stimuli (Fig S2A). Thus, GCaMP6s (Kd =  
121 144 nM) (Chen et al., 2013) is functional in *Dictyostelium* cells and appropriate to  
122 visualize  $[Ca^{2+}]_i$  dynamics during aggregation and sequential development.  
123 Oscillations of fluorescence signals and wave propagation were observed at the

124 early aggregation and mound stages of cells expressing GCaMP6s (Fig. 1B–D,  
125 Fig. S1B–D, Movies 2–6). These signal propagation and oscillations were not  
126 observed in the populations of *ip1A*<sup>-</sup> cells during development (Fig. S2B, C, Movie  
127 7), demonstrating that the periodic changes in GCaMP6s signals in developing  
128 *Dictyostelium* cells reflects  $[Ca^{2+}]_i$  oscillations caused by cAMP signal relay. The  
129 period of oscillations at the early mound stage was significantly shorter than those  
130 at the early aggregation and late mound stages ( $p < 0.001$ ) (Fig. 1E). The early  
131 and late mound stages observed in this study correspond to the loose and tight  
132 mound stages, respectively. The periods of  $[Ca^{2+}]_i$  oscillations at the early  
133 aggregation, early and late mound stages were  $5.29 \pm 0.59$ ,  $2.95 \pm 0.61$ , and  $4.60$   
134  $\pm 0.89$  min, respectively. These periods are consistent with those of  $[cAMP]_i$   
135 oscillations (Hashimura et al., 2019). Wave propagation was observed until the  
136 late mound stage; however, signal oscillations and propagation in cell populations  
137 disappeared when the late mound began elongation, which is the onset of  
138 multicellular slug formation (Fig. 1F–H, Movie 8). These indicate that  $[Ca^{2+}]_i$  signal  
139 dynamics show transition during multicellular morphogenesis as well as cAMP  
140 signal dynamics (Hashimura et al., 2019).

141

### 142 **Transient $[Ca^{2+}]_i$ burst and its propagation in migrating slugs**

143 In the late stage of *Dictyostelium* development, the late mound elongates into a  
144 cylindrical structure called a finger, and finger subsequently falls over and starts  
145 to migrate as a slug. When monitoring  $[Ca^{2+}]_i$  dynamics in migrating slugs using  
146 YC-Nano15, transient and rapid elevation of  $[Ca^{2+}]_i$ , namely "[ $Ca^{2+}$ ]<sub>i</sub> burst" and its  
147 propagation was observed (Fig. 2A, B, Movie 9), although no wave propagation

148 was observed at the finger stage (Fig. 1). Monitoring the signal using GCaMP6s  
149 also detected such transient signal propagation in migrating slugs, and the  $[Ca^{2+}]_i$   
150 bursts were observed in both the anterior and posterior part of slugs which can  
151 be regarded as the prestalk and prespore region, respectively (Fig. 2C–F, Movies  
152 10, 11). When the  $[Ca^{2+}]_i$  burst occurred in the slug, the velocity of slug migration  
153 transiently increased with a peak delay of approximately 2 min (Fig. 2B, Movie 9).  
154 The periodicity of  $[Ca^{2+}]_i$  signals as observed in cell populations during  
155 aggregation and mound stages (Fig. 1) was not observed in migrating slugs, and  
156 slugs occasionally showed irregular  $[Ca^{2+}]_i$  burst (Fig. 2 and S3). Thus, although  
157 periodic  $[Ca^{2+}]_i$  signal propagations disappeared during the process of  
158 multicellular formation, the ability of  $Ca^{2+}$  signaling was maintained after slug  
159 formation, and the occasional propagation of  $[Ca^{2+}]_i$  waves in migrating slugs  
160 affected the cooperative movement of cells.

161

### 162 **$[Ca^{2+}]_i$ burst and wave propagation in slugs are induced by mechanical** 163 **stimulation**

164 On closer observation,  $[Ca^{2+}]_i$  burst in slugs occurred when a part of the slug  
165 touched the surface of the agar (Fig. 2C, E and Movies 10, 11). This proposes  
166 the possibility that rapid  $[Ca^{2+}]_i$  elevation in slugs was induced in response to  
167 mechanical stimuli. To confirm this,  $[Ca^{2+}]_i$  dynamics was monitored using  
168 GCaMP6s when the slug was subjected to mechanical stimulation. The slug  
169 developed on the agar was cut out with the agar, turned over onto the glass,  
170 sandwiched between the glass and the agar, and pressed from above with a 5  
171 mm diameter plastic rod such that the slug was not crushed, and the entire slug

172 was stimulated evenly (Fig. S4A). In all tests using wild-type expressing  
173 GCaMP6s,  $[Ca^{2+}]_i$  in the slug increased transiently with a peak at  $25.0 \pm 4.1$  s  
174 after all stimulation ( $n = 9$ ) (Fig. 3A, B and Movie 12). Additionally, when the tip of  
175 a slug was pricked using a micropipette (Fig. S4B),  $[Ca^{2+}]_i$  burst was induced and  
176 signal waves were propagated toward the posterior region (Fig. 3C, D and Movie  
177 13). A similar response was observed when the posterior region of the slug was  
178 stimulated (Fig. 3E, F and Movie 14). These indicate that  $[Ca^{2+}]_i$  burst and wave  
179 propagation in the slug occurs in response to mechanical stimulation. In addition,  
180 this mechanical response can be applied to either the anterior or posterior regions  
181 of the slug.

182

### 183 **Ip1A $Ca^{2+}$ channel is involved in calcium signaling in response to** 184 **mechanical stimulation in the slug**

185 At the unicellular phase of *Dictyostelium*, the IP3 receptor Ip1A, which is localized  
186 in the endoplasmic reticulum (ER), is involved in calcium signaling, and  
187 responsible for  $[Ca^{2+}]_i$  elevation in response to mechanical stimuli (Lombardi et  
188 al., 2008). To confirm whether Ip1A is involved in  $[Ca^{2+}]_i$  burst induced by  
189 mechanical stimulation in a slug,  $[Ca^{2+}]_i$  signal responses to mechanical stimuli  
190 in slugs lacking *ip1A* was investigated. When *ip1A*<sup>-</sup> slugs were stimulated with a  
191 plastic rod,  $[Ca^{2+}]_i$  bursts occurred; however, the percentage of slug that  
192 responded dropped to 46% ( $n = 39$ ), and the response peaked at  $15.7 \pm 7.9$  s ( $n$   
193 = 18), earlier than in the wild type (Fig. 3, 4). Calcium response was also observed  
194 when *ip1A*<sup>-</sup> slugs bumped into the agar as well as the wild type (Fig. S5). These  
195 results suggest that  $[Ca^{2+}]_i$  burst and wave propagation in response to



196 mechanical stimuli are partially mediated by the IplA channel.

197

198 **Calcium influx from outside the cell allows for a rapid response to**  
199 **mechanical stimuli**

200 Deletion of IplA did not completely abolish the calcium response of the slug to  
201 mechanical stimulation (Fig. 4), indicating that another calcium pathway  
202 contributes to mechanosensing. It has been reported that extracellular  $\text{Ca}^{2+}$  influx  
203 via the Piezo channel homolog is important for mechanosensing at the unicellular  
204 stage of *Dictyostelium* (Srivastava et al., 2020). To investigate whether  $\text{Ca}^{2+}$  influx  
205 from outside the cell occurs even in the multicellular stage, calcium response was  
206 monitored with the agar medium containing ethylene glycol-bis( $\beta$ -aminoethyl  
207 ether)-N,N,N',N'-tetraacetic acid (EGTA), a  $\text{Ca}^{2+}$  chelating agent. All multicellular  
208 bodies overlaid with agar containing 1 mM EGTA showed an increase in  $[\text{Ca}^{2+}]_i$   
209 in response to mechanical stimuli ( $n = 13$ ) (Fig. 5A, B). However, in the presence  
210 of EGTA, the response peak was significantly slower at  $67.7 \pm 16.8$  seconds ( $p <$   
211  $0.001$ ) (Fig. 5B, E). Additionally, *iplA*<sup>-</sup> slugs in the presence of 1 mM EGTA did not  
212 show any calcium response to mechanical stimulation ( $n = 13$ ) (Fig. 5C). These  
213 and *iplA*<sup>-</sup> deficient results indicate that  $\text{Ca}^{2+}$  influx from extracellular sources  
214 allows a fast response, whereas IplA is essential for the response from  
215 intracellular sources (Fig. 4, 5C). We constructed the PzoA null strain and  
216 confirmed that PzoA is essential for  $\text{Ca}^{2+}$  influx from extracellular sources by  
217 mechanical stimulation in unicellular cells as previously reported (Fig. S6)  
218 (Srivastava et al., 2020). In contrast, multicellular bodies of *pzoA*<sup>-</sup> strain  
219 responded similarly to wild-type cells, suggesting that  $\text{Ca}^{2+}$  influx occurs from

220 other pathways during the multicellular phase (Fig. 5D, E).

221

## 222 **Discussion**

223 In *Dictyostelium* cells, transient  $[Ca^{2+}]_i$  changes have been observed in the  
224 mound and slug stages (Cubitt et al., 1995); however, the actual dynamics of  $Ca^{2+}$   
225 signaling has not been clarified, because most previous studies of calcium  
226 signaling have focused on the stages up to cell aggregation (Horikawa et al.,  
227 2010; Nebl and Fisher, 1997; Schlatterer et al., 1992; Traynor et al., 2000). In this  
228 study, live imaging of  $[Ca^{2+}]_i$  during the development of *Dictyostelium* with highly-  
229 sensitive GECIs revealed that synchronized  $[Ca^{2+}]_i$  elevation and its propagation  
230 in cell populations occur continuously at the aggregation and mound stages;  
231 however, they temporarily disappear during multicellular formation.  $Ca^{2+}$  wave  
232 propagation depends on cAMP relay at the early aggregation and mound stages,  
233 and cAMP wave propagation disappears during tip elongation of the late mound  
234 (Fujimori et al., 2019; Hashimura et al., 2019). The cAMP signal has been shown  
235 to induce transient  $[Ca^{2+}]_i$  elevation (Abe et al., 1988; Nebl and Fisher, 1997).  
236 Therefore, changes in the dynamics of  $[Ca^{2+}]_i$  during development follow the  
237 transition of cAMP relay. Alternatively, we found that  $[Ca^{2+}]_i$  burst and its  
238 propagation occasionally occurred in slugs. When  $[Ca^{2+}]_i$  waves were propagated  
239 in the migrating slug, velocity of the slug transiently increased.  $Ca^{2+}$  signaling  
240 affects both cell movement at the unicellular stage and slug behavior (Dohrmann  
241 et al., 1984; Fache et al., 2005; Lombardi et al., 2008). Thus,  $[Ca^{2+}]_i$  wave  
242 propagation is involved in coordinated movements of multiple cells throughout  
243 development. Calcium wave propagation and its effect on cell behavior are also

244 well known in animal cells, and gap-junction is essential for cell-cell signaling  
245 (Leybaert and Sanderson, 2012). Given that *D. discoideum* has no homologue of  
246 gap junction components (Johnson et al., 1977; Kaufmann et al., 2012), the  
247 mechanism for calcium signal propagation in multicellular bodies is gap junction  
248 independent. Another possible mechanism of calcium wave propagation is ATP-  
249 mediated paracrine signaling (Leybaert and Sanderson, 2012). It has been  
250 reported that *Dictyostelium* cells release ATP as an extracellular signal  
251 (Sivaramakrishnan and Fountain, 2015). Extracellular ATP causes an increase in  
252  $[Ca^{2+}]_i$  in *Dictyostelium* cells via P2X receptors and polycystin-type Trp channels  
253 that are either the ATP receptor or closely coupled to ATP (Ludlow et al., 2008;  
254 Traynor and Kay, 2017). Recently, it has been suggested that ATP levels  
255 contribute to differentiation during the multicellular phase (Hiraoka et al., 2020).  
256 This implies that slug cells secrete ATP, which might trigger wave propagation of  
257 elevated  $[Ca^{2+}]_i$  in tissue.

258

259 *Dictyostelium* cells show  $[Ca^{2+}]_i$  elevation in response to cAMP signals and  
260 mechanical stimuli at the unicellular phase (Artemenko et al., 2016; Lombardi et  
261 al., 2008; Srivastava et al., 2020). Our assay showed that  $[Ca^{2+}]_i$  burst and its  
262 propagation were induced by mechanical stimuli at the slug stage. The *lplA*  $Ca^{2+}$   
263 channel is involved in  $[Ca^{2+}]_i$  elevation in response to mechanical stimuli at the  
264 unicellular phase (Artemenko et al., 2016; Lombardi et al., 2008; Srivastava et al.,  
265 2020). In slugs of the *lplA*<sup>-</sup> strain, the response efficiency of calcium signaling to  
266 mechanical stimulation was reduced, suggesting that *lplA* is responsible for  
267 increasing the certainty of response to mechanical stimuli. The *lplA* channel is

268 essential for  $\text{Ca}^{2+}$  dependent flow-directed motility; however, not for chemotactic  
269 migration toward cAMP gradients (Lusche et al., 2012). This suggests that the  
270 cAMP signaling pathway and the IplA mediated  $\text{Ca}^{2+}$  signaling pathway affect the  
271 downstream independently each other. This proposition is supported by the  
272 observation that there is no clear defect in the development of *iplA*<sup>-</sup> cells under  
273 laboratory conditions (Movie 7). However, mechanosensing may play important  
274 roles in efficient morphogenesis in natural environments where cells of soil-living  
275 amoebae *Dictyostelium* are exposed to various stimuli and physical barriers  
276 (Bonner and Lamont, 2005). Therefore, mechanical stimulation response of  $\text{Ca}^{2+}$   
277 signaling via IplA would be important in natural environments (Movie 2).  
278 Alternatively, the calcium signaling response to mechanical stimulation was not  
279 completely abolished in *iplA*<sup>-</sup> slugs, suggesting that other signal pathways are  
280 involved in the elevation of cytosolic  $[\text{Ca}^{2+}]_i$  in the mechanical response of slugs.  
281 In higher eukaryotes, the stretch-activated  $\text{Ca}^{2+}$  permeable ion channel Piezo is  
282 involved in mechanical stimulus responses (Coste et al., 2010; Fang et al., 2021).  
283 Recently, it has been reported that *D. discoideum* has the homologue of Piezo,  
284 PzoA, and disruption of the *pzoA* gene causes the defect of  $[\text{Ca}^{2+}]_i$  response to  
285 mechanical stimuli at the unicellular phase (Srivastava et al., 2020). Additionally,  
286 mutant cells lacking PzoA can develop normally under laboratory conditions;  
287 however, a defect is observed in chemotactic migration under confined conditions  
288 (Srivastava et al., 2020). Slugs with cells lacking *pzoA* did not show a substantial  
289 difference in calcium response from the wild type. Notably, the Piezo channel,  
290 which works in higher multicellular organisms, works only in the unicellular phase  
291 in *Dictyostelium*. Even within *Dictyostelium*, the system changes differently, with

292 Piezo acting as the main pathway during the unicellular phase, and pathways  
293 from the extracellular and ER during the multicellular phase. In *lplA*-null cells, the  
294  $[Ca^{2+}]_i$  response was faster than in the wild type. This indicates that the apparent  
295 single-peak  $[Ca^{2+}]_i$  burst is a mixture of a fast extracellular  $Ca^{2+}$  influx and a  
296 slower yet more efficient response from the ER. The delay in the calcium  
297 response from the ER compared to extracellular signals may be due to the fact  
298 that the signal from mechanoreceptors in the plasma membrane is transmitted  
299 via IP3 signaling. Moreover, in the unicellular phase of *lplA*-null cells, no calcium  
300 response to mechanical stimuli was detected, even though *lplA* is not involved in  
301 blebbing, which is regulated by calcium signaling related to mechanical  
302 stimulation (Srivastava et al., 2020). In human colorectal carcinoma cell line  
303 (DLD1 cells), membrane blebbing is regulated by store-operated calcium entry,  
304 which is controlled by ER proteins (Aoki et al., 2021). Alternatively, although no  
305 homologue of STIM has been found in *Dictyostelium* (Prakriya and Lewis, 2015),  
306 unknown store-operated calcium channels (SOCs) may be transducing  
307 mechanical stimuli.

308

309  $[Ca^{2+}]_i$  burst at both the tip and posterior regions in slugs indicates the ability of  
310 rapid  $[Ca^{2+}]_i$  elevation in both prestalk and prespore cells. Previous studies has  
311 shown that  $[Ca^{2+}]_i$  in the anterior part of the slugs is higher than that in the  
312 posterior part (Cubitt et al., 1995; Yumura et al., 1996). However, in our study,  
313 such a difference was not observed in slugs at the stationary phase that did not  
314 show any  $[Ca^{2+}]_i$  burst. As slugs migrate with their tips protruding up and down  
315 (Breen et al., 1987), the frequency of  $[Ca^{2+}]_i$  bursts evoked by mechanical stimuli

316 is higher in the anterior region than that of the posterior. Thus, it may have been  
317 frequently observed in previous studies that  $[Ca^{2+}]_i$  is higher in the anterior part  
318 of the slug than in the posterior part.

319

320 In conclusion, we revealed that  $[Ca^{2+}]_i$  burst and its propagation in populations of  
321 *Dictyostelium* cells occur dependently on cell-cell communication via diffusible  
322 chemical signals during the early developmental stage. Following multicellular  
323 formations, such  $Ca^{2+}$  signaling is triggered by mechanical stimuli. The system of  
324  $Ca^{2+}$  signaling in response to mechanical stimuli is conserved broadly in higher  
325 eukaryotes, animals, and prokaryotes such as *Escherichia coli* (Bruni et al., 2017;  
326 Leybaert and Sanderson, 2012; Wakai et al., 2021). We observed that social  
327 amoebae *D. discoideum* belonging to Amoebozoa uses  $Ca^{2+}$  signaling as a  
328 mechanosensing signal at the multicellular phase similarly to the unicellular  
329 phase (Srivastava et al., 2020); however, the molecular mechanism is different.  
330 Thus, this study demonstrates that mechanochemical signal transduction via  
331  $Ca^{2+}$  signaling is a universal system for response to mechanical stimuli and can  
332 be applied in any cell type or state. In this study, the extracellular  $Ca^{2+}$  pathway  
333 associated with mechanical stimulation in the multicellular bodies of *D.*  
334 *discoideum* has not been identified. This is because even though  $Ca^{2+}$  act as a  
335 signal across species, the molecular mechanisms differ between species. Further  
336 studies are required to clarify conserved and specific molecular mechanisms,  
337 respectively.

338

## 339 **Material and Methods**

### 340 **Cell strains and culture conditions**

341 *Dictyostelium discoideum* strains used in this study are listed in Table S1. The  
342 *pzoA*<sup>-</sup> strain was constructed using the vector pKOSG-IBA-dicty1 (iba) following  
343 the manufacturer's instructions (Wiegand et al., 2011). The 5' region and 3' region  
344 of flanking sequences were generated via polymerase chain reaction (PCR) and  
345 cloned into pKOSG-IBA-dicty1 (Fig. S6A). Primer pairs used for PCR were  
346 pzA\_KO\_LA1/pzA\_KO\_LA2 (5') and pzA\_KO\_RA1/pzA\_KO\_RA2 (3') (Table.  
347 S2). *pzoA* gene disruption was confirmed via PCR. Cells were grown axenically  
348 in HL5 medium (Formedium, UK) in culture dishes at 21 °C. Transformants were  
349 maintained at 20 µg mL<sup>-1</sup> G418 (Fujifilm Wako, Japan) or 10 µg mL<sup>-1</sup> BlasticidinS  
350 (Fujifilm Wako, Japan).

351

### 352 **Plasmid construction and genetic manipulation**

353 Plasmids used in this study are listed in Table S3. pHK12neo\_Dd-GCaMP6s was  
354 constructed by insertion of synthesized GCaMP6s fragments (GenScript) into the  
355 BglII and SpeI sites of pHK12neo. The codon usages of the GCaMP6s sequence  
356 were optimized to those of *D. discoideum* for efficient protein expression in  
357 *Dictyostelium* cells. The wild-type strain and mutant cells were transformed with  
358 ~1.5 µg plasmid via electroporation (Kuwayama et al., 2008), and transformants  
359 were selected with G418 or BlasticidinS.

360

### 361 **Instruments for image acquisition and analysis**

362 In all experiments, cells were observed at 22 °C. Confocal images were taken

363 using a confocal laser microscope (A1 confocal laser microscope system, Nikon,  
364 Japan) with an oil immersion lens (Plan Fluor 40×/1.30 NA, Nikon) or an inverted  
365 microscope (Eclipse Ti, Nikon) equipped with a CSU-W1 confocal scanner unit  
366 (Yokogawa), two sCMOS cameras (ORCA-Flash4.0v3, Hamamatsu Photonics,  
367 Japan) and an oil immersion lenses (Plan Apo 60×/1.40 NA or CFI Apo TIRF  
368 60×/1.49, Nikon). GCaMP6s and YC-Nano15 were excited using a 488 and 440  
369 nm solid-state CW laser, respectively. Epifluorescence imaging was taken using  
370 an inverted epifluorescence microscope (IX83, Olympus, Japan) equipped with a  
371 130 W mercury lamp system (U-HGLGPS, Olympus), sCMOS cameras (Zyla4.2,  
372 Andor Technology or Prime 95B, Photometrics, USA) and objective lenses  
373 (UPLSAPO 4×/0.16 NA, UPLSAPO 10×/0.40 NA, UPLSAPO 20×/0.75 NA,  
374 Olympus). Cells expressing GCaMP6s were observed using fluorescence mirror  
375 units U-FGFP (Excitation BP 460–480, Emission BP 495–540, Olympus). All  
376 images were processed and analyzed using Fiji and R software. The period of an  
377 oscillation of GCaMP6s signals was calculated by averaging the difference  
378 between the peaks of the oscillation. Data with at least three peaks in the  
379 oscillation were used for the analysis. In general, fluorescence intensities of  
380 GCaMP6s and the ratio of YFP/CFP channels of YCNano15 were normalized  
381 with values at  $t = 0$ .

382

### 383 **Live image of $[Ca^{2+}]_i$ dynamics during *Dictyostelium* development**

384 Image acquisition of *Dictyostelium* development was performed as reported by a  
385 previous study (Hashimura et al., 2019). To induce development upon starvation,  
386 cells at the exponential phase ( $1.5\text{--}3 \times 10^6$  cells  $\text{ml}^{-1}$ ) were harvested and



387 washed three times in KK2 phosphate buffer (20 mM  $\text{KH}_2\text{PO}_4/\text{K}_2\text{HPO}_4$ , pH 6.0).  
388 To observe all developmental stages, cells were plated on the entire surface of  
389 2% water agar (2% w/v Difco Bacto-agar in ultrapure water) at a density of  $5\text{--}7 \times$   
390  $10^5$  cells  $\text{cm}^{-2}$  on a 35-mm plastic dish (Iwaki, Japan) and incubated at 21 °C.  
391 Thereafter, plates were filled with liquid paraffin (Nacalai Tesque, Japan) to avoid  
392 light scattering and placed on the stage of the microscope for image acquisition.  
393 Additionally, the “2D slug” method (Bonner, 1998; Rieu, Barentin, Sawai, Maeda,  
394 & Sawada, 2004) was applied for observing slug migration without three-  
395 dimensional scroll movement (Fig. 4A and S2). One microliter cell suspension ( $4$   
396  $\times 10^7$  cells  $\text{mL}^{-1}$ ) was dropped on 2% water agar plates with 2  $\mu\text{L}$  liquid paraffin.  
397 A coverslip was placed over the suspension and incubated at 21 °C for longer  
398 than 15 h.

399

#### 400 **Validation of GCaMP6s as an indicator of $[\text{Ca}^{2+}]_i$ changes in chemotactic-** 401 **competent *Dictyostelium* cells**

402 *Dictyostelium* cells expressing Dd-GCaMP6s were suspended in 1 mL  
403 developmental buffer (DB: 5 mM Na/KPO<sub>4</sub>, 2 mM MgSO<sub>4</sub>, 0.2 mM CaCl<sub>2</sub>, pH 6.5)  
404 at a density of  $5 \times 10^5$  cells  $\text{mL}^{-1}$  and incubated for 1 h. Thereafter, cells were  
405 exposed to 100 nM cAMP pulses given at 6 min intervals for a subsequent 5 h.  
406 Following starvation with cAMP pulse treatment, cells were washed three times  
407 with 1 mL DB and resuspended in DB at a density of  $10^6$  cells  $\text{mL}^{-1}$ . Forty  
408 microliters of cell suspension was deposited onto a glass bottom dish. Cells were  
409 stimulated by adding 160  $\mu\text{L}$  of 12.5  $\mu\text{M}$  cAMP (Sigma Aldrich, USA) solution to  
410 the cell droplet (final concentration, 10  $\mu\text{M}$ ). During stimulation, fluorescent

411 images of starved cells were taken using the confocal microscope at 5 s interval.  
412 Averaged fluorescence intensities of GCaMP6s in  $5 \mu\text{m}^2$  regions positioned within  
413 the cytosol were estimated at each time point.

414

#### 415 **Monitoring of $[\text{Ca}^{2+}]_i$ response in slugs to mechanical stimulation**

416 To observe the response of migrating slugs to mechanical stimulation, 5  $\mu\text{L}$  of cell  
417 suspension at a density of  $4 \times 10^7$  cells  $\text{mL}^{-1}$  was deposited on 2% water agar  
418 with or without 1 mM EGTA and incubated at 21 °C for 12–15 h. Following slug  
419 formation, a piece of agar with slugs was cut out and placed upside down on a  
420 spacer attached to a 35 mm glass bottom dish (12 mm diameter glass, Iwaki).  
421 The spacer was filled with liquid paraffin to prevent desiccation during observation  
422 and avoid light scattering. A slug covered by agar was pushed with a 5 mm  
423 diameter plastic rod using a micromanipulator system (MM-94 and MMO-4,  
424 Narishige, Japan) (Fig. S4A). In the micropipette assay, a piece of agar with slugs  
425 was cut out and placed directly on a 35 mm glass bottom dish (12 mm diameter  
426 glass, Iwaki). A wet paper was placed in the dish and the agar piece was covered  
427 with liquid paraffin. A Femtotip microcapillary (1  $\mu\text{m}$  tip diameter, Eppendorf,  
428 Germany) was mounted onto a Femtojet pump and micromanipulator  
429 (Eppendorf), and the pipette was pricked on the slug by manual operation with  
430 the manipulator (Fig. S4B). During mechanical stimulation, fluorescence images  
431 of slugs expressing GCaMP6s were acquired at 5 s interval using the  
432 epifluorescence microscope.

433

434

435

## 436 **Acknowledgements**

437 We acknowledge Yuko Baba for technical assistance and Takuo Yasunaga for  
438 continuous support and encouragement. H.H. was supported by the RIKEN JRA  
439 program.

440

## 441 **Competing interests**

442 The authors declare no competing interests.

443

## 444 **Author contributions**

445 H.H. conceived and designed the study, performed the experiments, analyzed  
446 the data, and wrote the manuscript. Y.H. performed the experiments and  
447 analyzed the data. M.U. designed the study, contributed to the interpretation of  
448 the data analysis. Y.V.M. designed the study, performed the experiments,  
449 analyzed the data and wrote the manuscript.

450

## 451 **Funding**

452 This work was supported in part by JSPS KAKENHI Grant Numbers JP19H00982  
453 (to M.U.), JP15H05593, JP18K06159 and JP21K06099 (to Y.V.M.), JP20J00751  
454 and JP21K15081 (to H.H.) and JST PRESTO Grant Number JPMJPR204B (to  
455 Y.V.M.). This work has also been partially supported by AMED-CREST Grant  
456 Number JP20gm0910001.

457

458 **References**

- 459 **Abe, T., Maeda, Y. and Iijima, T.** (1988). Transient increase of the intracellular  
460  $Ca^{2+}$  concentration during chemotactic signal transduction in  
461 *Dictyostelium discoideum* cells. *Differentiation* **39**, 90-96.
- 462 **Aoki, K., Harada, S., Kawaji, K., Matsuzawa, K., Uchida, S. and Ikenouchi,**  
463 **J.** (2021). STIM-Orai1 signaling regulates fluidity of cytoplasm during  
464 membrane blebbing. *Nat Commun* **12**, 480.
- 465 **Artemenko, Y., Axiotakis, L., Jr., Borleis, J., Iglesias, P. A. and Devreotes,**  
466 **P. N.** (2016). Chemical and mechanical stimuli act on common signal  
467 transduction and cytoskeletal networks. *Proc Natl Acad Sci U S A* **113**,  
468 E7500-E7509.
- 469 **Berridge, M. J., Bootman, M. D. and Roderick, H. L.** (2003). Calcium  
470 signalling: dynamics, homeostasis and remodelling. *Nat Rev Mol Cell*  
471 *Biol* **4**, 517-529.
- 472 **Bonner, J. T. and Lamont, D. S.** (2005). Behavior of cellular slime molds in the  
473 soil. *Mycologia* **97**, 178-184.
- 474 **Breen, E. J., Vardy, P. H. and Williams, K. L.** (1987). Movement of the  
475 multicellular slug stage of *Dictyostelium discoideum*: an analytical  
476 approach. *Development* **101**, 313.
- 477 **Bruni, G. N., Weekley, R. A., Dodd, B. J. T. and Kralj, J. M.** (2017). Voltage-  
478 gated calcium flux mediates *Escherichia coli* mechanosensation. *Proc*  
479 *Natl Acad Sci U S A* **114**, 9445-9450.
- 480 **Canales, J., Morales, D., Blanco, C., Rivas, J., Diaz, N., Angelopoulos, I.**  
481 **and Cerda, O.** (2019). A TR(i)P to Cell Migration: New Roles of TRP  
482 Channels in Mechanotransduction and Cancer. *Front Physiol* **10**, 757.
- 483 **Chen, T. W., Wardill, T. J., Sun, Y., Pulver, S. R., Renninger, S. L., Baohan,**  
484 **A., Schreiter, E. R., Kerr, R. A., Orger, M. B., Jayaraman, V., et al.**  
485 (2013). Ultrasensitive fluorescent proteins for imaging neuronal activity.  
486 *Nature* **499**, 295-300.
- 487 **Chifflet, S., Justet, C., Hernandez, J. A., Nin, V., Escande, C. and Benech,**  
488 **J. C.** (2012). Early and late calcium waves during wound healing in  
489 corneal endothelial cells. *Wound Repair Regen* **20**, 28-37.
- 490 **Clapham, D. E.** (2007). Calcium signaling. *Cell* **131**, 1047-1058.
- 491 **Coste, B., Mathur, J., Schmidt, M., Earley, T. J., Ranade, S., Petrus, M. J.,**  
492 **Dubin, A. E. and Patapoutian, A.** (2010). Piezo1 and Piezo2 are  
493 essential components of distinct mechanically activated cation channels.

- 494 *Science* **330**, 55-60.
- 495 **Cubitt, A. B., Firtel, R. A., Fischer, G., Jaffe, L. F. and Miller, A. L.** (1995).  
496 Patterns of free calcium in multicellular stages of *Dictyostelium*  
497 expressing jellyfish apoaequorin. *Development* **121**, 2291-2301.
- 498 **Dohrmann, U., Fisher, P. R., Bruderlein, M. and Williams, K. L.** (1984).  
499 Transitions in *Dictyostelium discoideum* behaviour: influence of calcium  
500 and fluoride on slug phototaxis and thigmotaxis. *J Cell Sci* **65**, 111-121.
- 501 **Fache, S., Dalous, J., Engelund, M., Hansen, C., Chamaraux, F., Fourcade,**  
502 **B., Satre, M., Devreotes, P. and Bruckert, F.** (2005). Calcium  
503 mobilization stimulates *Dictyostelium discoideum* shear-flow-induced cell  
504 motility. *J Cell Sci* **118**, 3445-3457.
- 505 **Fang, X. Z., Zhou, T., Xu, J. Q., Wang, Y. X., Sun, M. M., He, Y. J., Pan, S. W.,**  
506 **Xiong, W., Peng, Z. K., Gao, X. H., et al.** (2021). Structure, kinetic  
507 properties and biological function of mechanosensitive Piezo channels.  
508 *Cell Biosci* **11**, 13.
- 509 **Fujimori, T., Nakajima, A., Shimada, N. and Sawai, S.** (2019). Tissue self-  
510 organization based on collective cell migration by contact activation of  
511 locomotion and chemotaxis. *Proc Natl Acad Sci U S A* **116**, 4291-4296.
- 512 **Gregor, T., Fujimoto, K., Masaki, N. and Sawai, S.** (2010). The onset of  
513 collective behavior in social amoebae. *Science* **328**, 1021-1025.
- 514 **Hashimura, H., Morimoto, Y. V., Yasui, M. and Ueda, M.** (2019). Collective  
515 cell migration of *Dictyostelium* without cAMP oscillations at multicellular  
516 stages. *Commun Biol* **2**, 34.
- 517 **Hiraoka, H., Nakano, T., Kuwana, S., Fukuzawa, M., Hirano, Y., Ueda, M.,**  
518 **Haraguchi, T. and Hiraoka, Y.** (2020). Intracellular ATP levels influence  
519 cell fates in *Dictyostelium discoideum* differentiation. *Genes Cells* **25**,  
520 312-326.
- 521 **Horikawa, K., Yamada, Y., Matsuda, T., Kobayashi, K., Hashimoto, M.,**  
522 **Matsu-ura, T., Miyawaki, A., Michikawa, T., Mikoshiba, K. and Nagai,**  
523 **T.** (2010). Spontaneous network activity visualized by ultrasensitive Ca<sup>2+</sup>  
524 indicators, yellow Cameleon-Nano. *Nat Methods* **7**, 729-732.
- 525 **Johnson, G., Johnson, R., Miller, M., Borysenko, J. and Revel, J. P.** (1977).  
526 Do cellular slime molds form intercellular junctions? *Science* **197**, 1300.
- 527 **Kaufmann, S., Weiss, I. M., Eckstein, V. and Tanaka, M.** (2012). Functional  
528 expression of Ca<sup>2+</sup> dependent mammalian transmembrane gap junction  
529 protein Cx43 in slime mold *Dictyostelium discoideum*. *Biochem Biophys*

- 530            *Res Commun* **419**, 165-169.
- 531    **Kuwayama, H., Yanagida, T. and Ueda, M.** (2008). DNA oligonucleotide-  
532            assisted genetic manipulation increases transformation and homologous  
533            recombination efficiencies: Evidence from gene targeting of  
534            *Dictyostelium discoideum*. *J Biotechnol* **133**, 418-423.
- 535    **Leybaert, L. and Sanderson, M. J.** (2012). Intercellular Ca<sup>2+</sup> waves:  
536            mechanisms and function. *Physiol Rev* **92**, 1359-1392.
- 537    **Lombardi, M. L., Knecht, D. A. and Lee, J.** (2008). Mechano-chemical  
538            signaling maintains the rapid movement of *Dictyostelium* cells. *Exp Cell*  
539            *Res* **314**, 1850-1859.
- 540    **Ludlow, M. J., Traynor, D., Fisher, P. R. and Ennion, S. J.** (2008). Purinergic-  
541            mediated Ca<sup>2+</sup> influx in *Dictyostelium discoideum*. *Cell Calcium* **44**, 567-  
542            579.
- 543    **Lusche, D. F., Wessels, D., Scherer, A., Daniels, K., Kuhl, S. and Soll, D. R.**  
544            (2012). The lplA Ca<sup>2+</sup> channel of *Dictyostelium discoideum* is necessary  
545            for chemotaxis mediated through Ca<sup>2+</sup>, but not through cAMP, and has a  
546            fundamental role in natural aggregation. *J Cell Sci* **125**, 1770-1783.
- 547    **Nebi, T. and Fisher, P. R.** (1997). Intracellular Ca<sup>2+</sup> signals in *Dictyostelium*  
548            chemotaxis are mediated exclusively by Ca<sup>2+</sup> influx. *J Cell Sci* **110 ( Pt**  
549            **22)**, 2845-2853.
- 550    **Parekh, A. B.** (2011). Decoding cytosolic Ca<sup>2+</sup> oscillations. *Trends Biochem Sci*  
551            **36**, 78-87.
- 552    **Pervin, M. S., Itoh, G., Talukder, M. S. U., Fujimoto, K., Morimoto, Y. V.,**  
553            **Tanaka, M., Ueda, M. and Yumura, S.** (2018). A study of wound repair in  
554            *Dictyostelium* cells by using novel laserporation. *Sci Rep* **8**, 7969.
- 555    **Prakriya, M. and Lewis, R. S.** (2015). Store-Operated Calcium Channels.  
556            *Physiol Rev* **95**, 1383-1436.
- 557    **Prole, D. L. and Taylor, C. W.** (2019). Structure and Function of IP3 Receptors.  
558            *Cold Spring Harb Perspect Biol* **11**.
- 559    **Schlatterer, C., Knoll, G. and Malchow, D.** (1992). Intracellular calcium during  
560            chemotaxis of *Dictyostelium discoideum*: a new fura-2 derivative avoids  
561            sequestration of the indicator and allows long-term calcium  
562            measurements. *Eur J Cell Biol* **58**, 172-181.
- 563    **Singer, G., Araki, T. and Weijer, C. J.** (2019). Oscillatory cAMP cell-cell  
564            signalling persists during multicellular *Dictyostelium* development.  
565            *Commun Biol* **2**, 139.

- 566 **Sivaramakrishnan, V. and Fountain, S. J.** (2015). Evidence for Extracellular  
567 ATP as a Stress Signal in a Single-Celled Organism. *Eukaryot Cell* **14**,  
568 775-782.
- 569 **Srivastava, N., Traynor, D., Piel, M., Kabla, A. J. and Kay, R. R.** (2020).  
570 Pressure sensing through Piezo channels controls whether cells migrate  
571 with blebs or pseudopods. *Proc Natl Acad Sci U S A* **117**, 2506-2512.
- 572 **Tomchik, K. J. and Devreotes, P. N.** (1981). Adenosine 3',5'-monophosphate  
573 waves in *Dictyostelium discoideum*: a demonstration by isotope dilution--  
574 fluorography. *Science* **212**, 443-446.
- 575 **Traynor, D. and Kay, R. R.** (2017). A polycystin-type transient receptor potential  
576 (Trp) channel that is activated by ATP. *Biol Open* **6**, 200-209.
- 577 **Traynor, D., Milne, J. L., Insall, R. H. and Kay, R. R.** (2000). Ca<sup>2+</sup> signalling is  
578 not required for chemotaxis in *Dictyostelium*. *EMBO J* **19**, 4846-4854.
- 579 **Volkers, L., Mechioukhi, Y. and Coste, B.** (2015). Piezo channels: from  
580 structure to function. *Pflugers Arch* **467**, 95-99.
- 581 **Wakai, M. K., Nakamura, M. J., Sawai, S., Hotta, K. and Oka, K.** (2021). Two-  
582 Round Ca<sup>2+</sup> transient in papillae by mechanical stimulation induces  
583 metamorphosis in the ascidian *Ciona intestinalis* type A. *Proc Biol Sci*  
584 **288**, 20203207.
- 585 **Weijer, C. J.** (1999). Morphogenetic cell movement in *Dictyostelium*. *Semin Cell*  
586 *Dev Biol* **10**, 609-619.
- 587 **Whitaker, M.** (2006). Calcium at fertilization and in early development. *Physiol*  
588 *Rev* **86**, 25-88.
- 589 **Wiegand, S., Kruse, J., Gronemann, S. and Hammann, C.** (2011). Efficient  
590 generation of gene knockout plasmids for *Dictyostelium discoideum*  
591 using one-step cloning. *Genomics* **97**, 321-325.
- 592 **Yin, J. and Kuebler, W. M.** (2010). Mechanotransduction by TRP channels:  
593 general concepts and specific role in the vasculature. *Cell Biochem*  
594 *Biophys* **56**, 1-18.
- 595 **Yumura, S., Furuya, K. and Takeuchi, I.** (1996). Intracellular free calcium  
596 responses during chemotaxis of *Dictyostelium* cells. *J Cell Sci* **109** ( Pt  
597 **11**), 2673-2678.
- 598

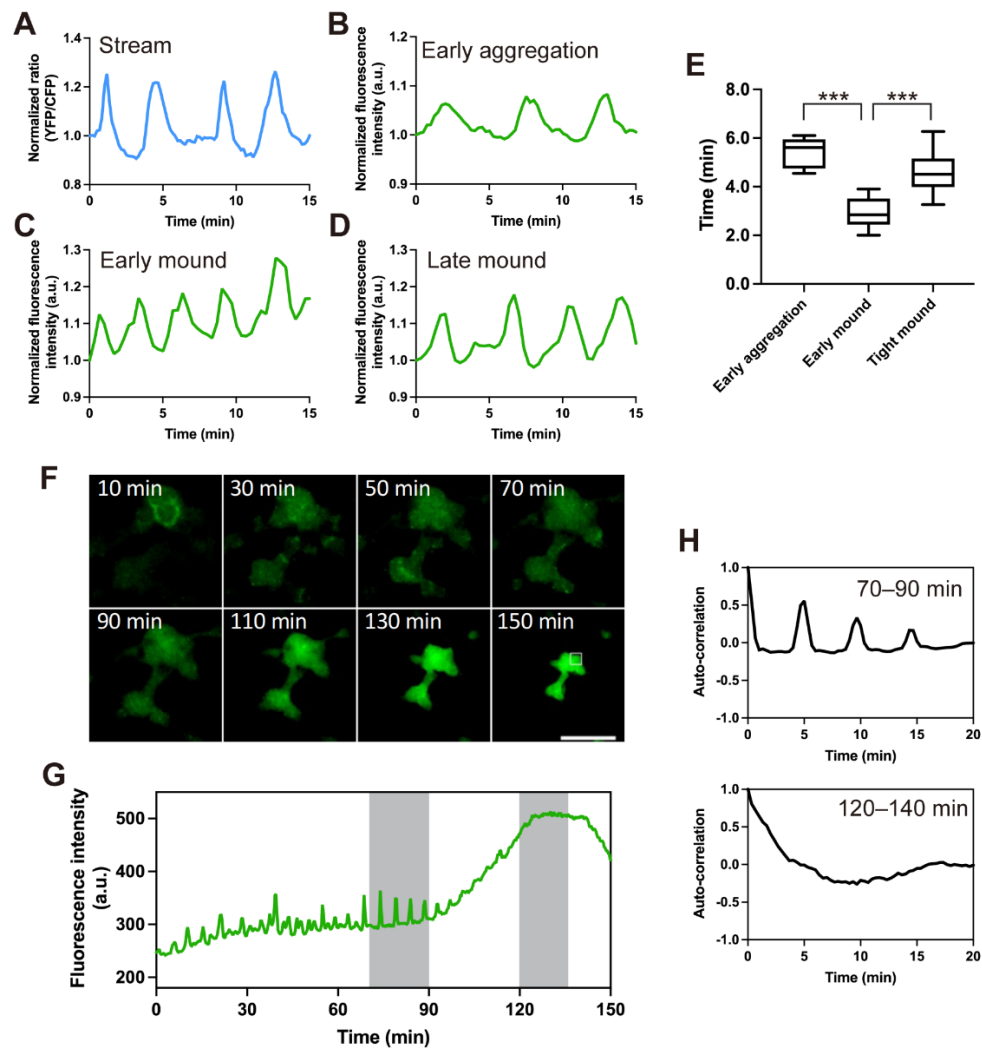

599

600 **Fig. 1.  $[Ca^{2+}]_i$  signal dynamics at each developmental stage of *Dictyostelium* cells.**

601 Time course plots of (A) Förster resonance energy transfer (FRET) signals of YC-  
602 Nano15 or (B–D) mean fluorescence intensity of GCaMP6s in a region indicated by a

603 white box (ROI) in Fig. S1. Size of ROI: A, 25  $\mu\text{m}$ . B, 250  $\mu\text{m}$ . C and D, 100  $\mu\text{m}$ . (A) An  
604 aggregating stream. (B) Early aggregation. (C) An early mound. (D) A late mound. (E)

605 Boxplot of periods of  $[Ca^{2+}]_i$  oscillations at three developmental stages. The lower and  
606 upper error lines indicate the smallest and largest values, respectively. At each dataset,

607  $n = 13$ . \*\*\*,  $p < 0.001$  (Wilcoxon rank sum test). (F) Fluorescence images of *Dictyostelium*  
608 cells expressing GCaMP6s during morphogenesis from the late mound to the finger

609 stage. Scale bar, 500  $\mu\text{m}$ . (G) Time course plot of mean fluorescence intensity of  
610 GCaMP6s in a 100  $\mu\text{m}^2$  region indicated by a white box in F. (H) Autocorrelation of

611 GCaMP6s signals at each development stage shown by gray bars in G. Note that the  
612 elevation of fluorescence intensity in the entire mound (90–150 min in F and G) is

613 primarily due to the increase in thickness of the tissue rather than  $[Ca^{2+}]_i$  elevation.



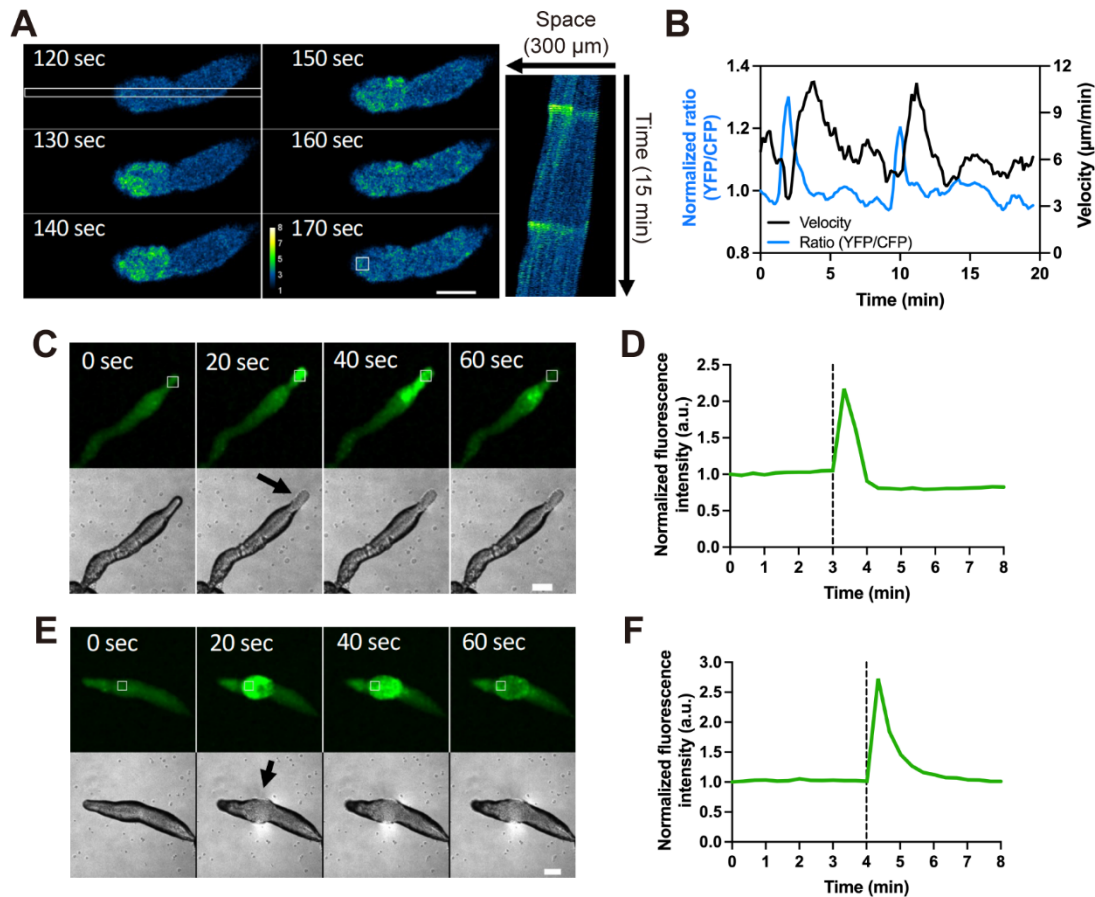

614

615

616

617

618

619

620

621

622

623

624

625

626

627

628

629

630

**Fig. 2. Intracellular  $\text{Ca}^{2+}$  levels ( $[\text{Ca}^{2+}]_i$ ) burst in *Dictyostelium* slugs during migration.** (A) Ratiometric images (YFP/CFP) of a slug expressing YC-Nano15 (Left).  $[\text{Ca}^{2+}]_i$  burst at a tip of the slug expressing YC-Nano15 and its propagation toward the posterior region of the slug are shown. Scale bar, 50  $\mu\text{m}$ . (Right) The kymograph of  $[\text{Ca}^{2+}]_i$  wave propagation in the region indicated by a white rectangle ( $10 \times 300 \mu\text{m}$ ) in the left panel for 15 min duration. (B) Time-course plot of Förster resonance energy transfer (FRET) signals in the tip of the slug (blue line) and slug velocity (black line). The FRET signals of YC-Nano15 in a  $15 \mu\text{m}^2$  region in the slug (white box in A) was measured. The curves of FRET signals and slug velocity were smoothed by a running average over four data points. (C and E)  $[\text{Ca}^{2+}]_i$  burst at a tip (C) or posterior region (E) of the slug expressing GCaMP6s. Fluorescence images of GCaMP6s (upper panels) and differential interference contrast (DIC) images (lower panels) are shown. Scale bar, 100  $\mu\text{m}$ . An arrow shows that the slugs are in contact with the agar surface. (D and F) Time course plot of the mean fluorescence intensity of GCaMP6s in a  $50 \mu\text{m}^2$  region indicated by a white box in C and E. Black dashed lines indicate the time point when the slug was in contact with the agar surface.

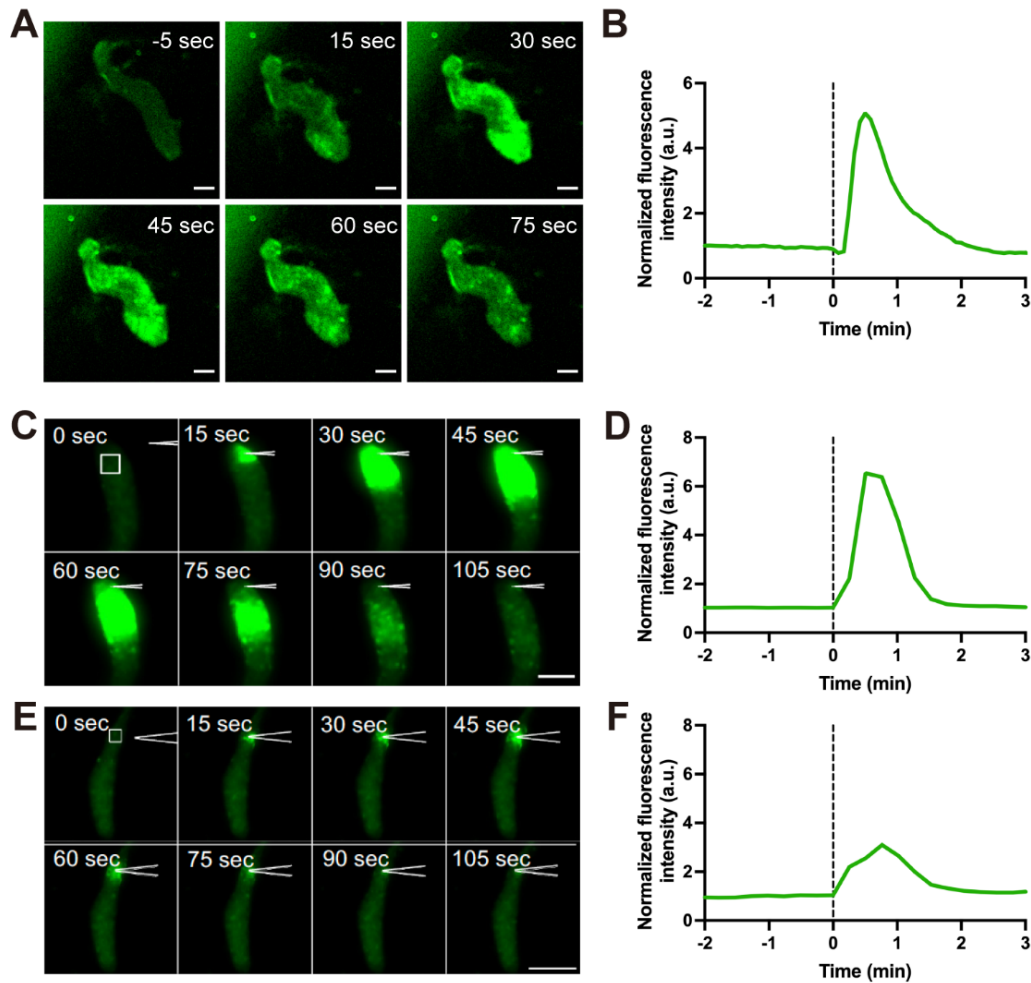

631

632 **Fig. 3. Intracellular  $\text{Ca}^{2+}$  levels ( $[\text{Ca}^{2+}]_i$ ) burst in *Dictyostelium* slugs induced by**  
633 **mechanical stimulation.** (A) Representative fluorescence images of a slug expressing

634 GCaMP6s mechanically stimulated with a plastic rod. Scale bar, 50  $\mu\text{m}$ . (B) Time course  
635 plot of the mean fluorescence intensity of GCaMP6s in a 25  $\mu\text{m}^2$  ROI of the anterior  
636 region in A. (C and E)  $[\text{Ca}^{2+}]_i$  burst at the tip (C) or posterior region (E) of the slug  
637 expressing Dd-GCaMP6s after mechanical stimulation by pricking with a micropipette.

638 Fluorescence images of slugs expressing Dd-GCaMP6s are shown. Anterior part of the  
639 slug faces the top (C) or bottom (E) side of images. Scale bar, (C) 50 and (E) 100  $\mu\text{m}$ .

640 (D and F) Time course plot of the mean fluorescence intensity of GCaMP6s in a 25  $\mu\text{m}^2$   
641 region indicated by a white box in C and E, respectively. Black dashed lines indicate the  
642 time point of mechanical stimulation.

643

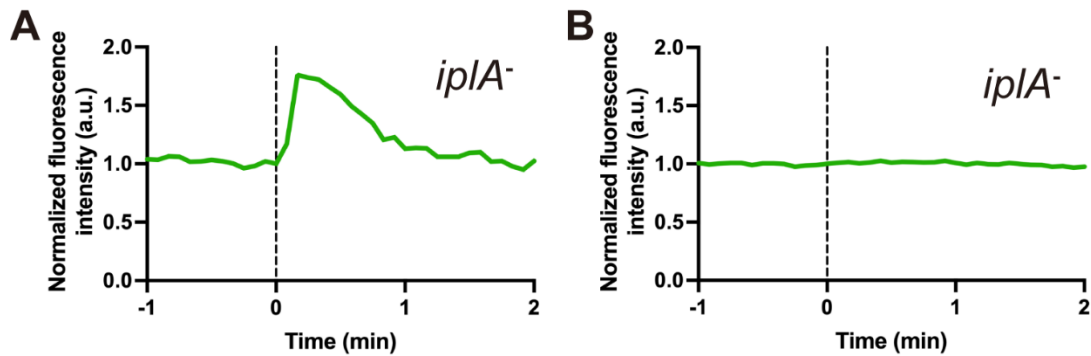

644

645

646

647

648

649

650

651

652

**Fig. 4. Intracellular  $\text{Ca}^{2+}$  levels ( $[\text{Ca}^{2+}]_i$ ) burst in *ip1A*<sup>-</sup> slugs induced by mechanical stimulation.**  $[\text{Ca}^{2+}]_i$  was monitored in the slug of *Ip1A* null cells expressing GCaMP6s after mechanical stimulation with a plastic rod. (A) Representative time course plot of the mean fluorescence intensity of GCaMP6s in a slug showing  $[\text{Ca}^{2+}]_i$  burst. (B) Representative time course plot of the mean fluorescence intensity of GCaMP6s in a slug showing no  $[\text{Ca}^{2+}]_i$  response. Black dashed lines indicate the time point of mechanical stimulation.

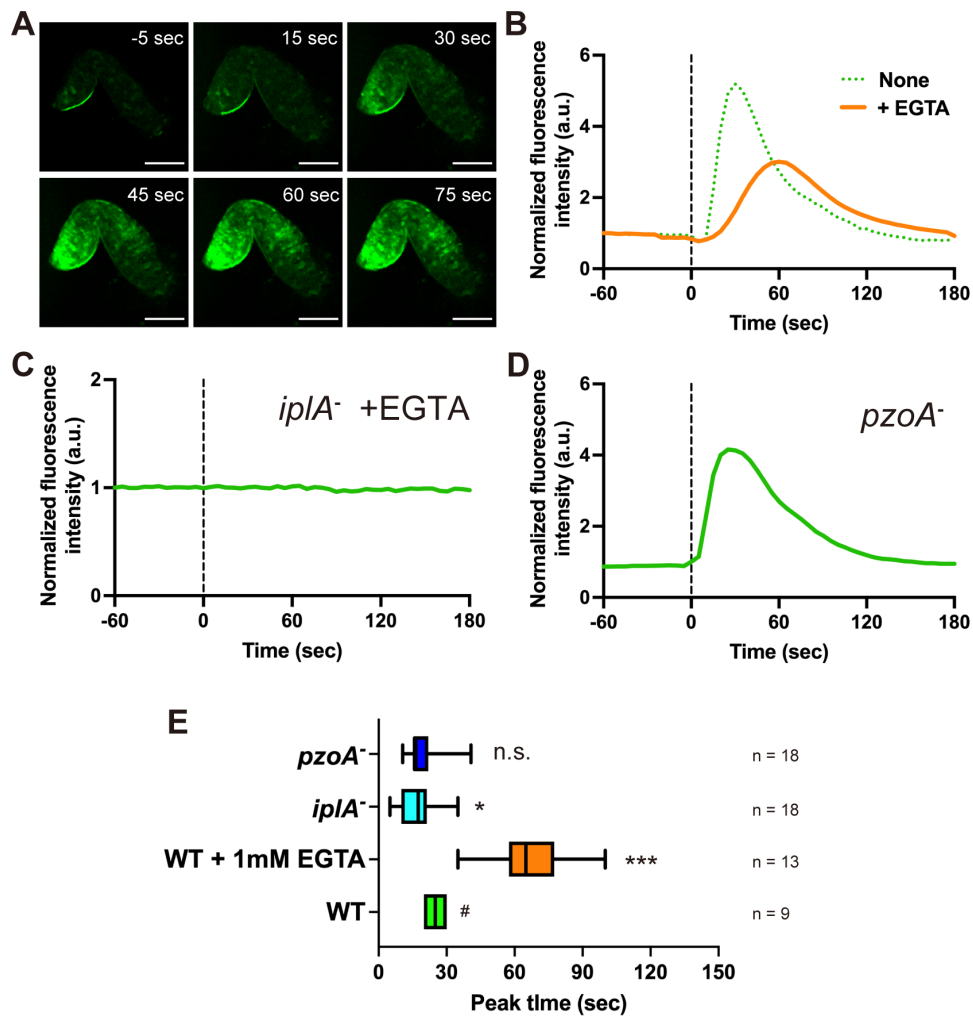

653

654 **Fig. 5. Effect of extracellular  $\text{Ca}^{2+}$  on intracellular  $\text{Ca}^{2+}$  levels ( $[\text{Ca}^{2+}]_i$ ) burst in**  
 655 ***Dictyostelium* slugs induced by mechanical stimulation.** (A) A wild-type slug was  
 656 covered with a piece of agar containing 1 mM aminoethyl ether)-N,N,N',N'-tetraacetic  
 657 acid (EGTA). Representative fluorescence images of GCaMP6s in a slug mechanically  
 658 stimulated with a rod on EGTA agar. Scale bar, 100  $\mu\text{m}$ . (B) Orange line shows time  
 659 course plot of the mean fluorescence intensity of GCaMP6s in a 25  $\mu\text{m}^2$  ROI of the  
 660 anterior region in A. The green dashed line shows the plot of fluorescence intensity  
 661 without EGTA in Fig. 3B. (C) Time course plot of the mean fluorescence intensity of  
 662 GCaMP6s in the slug of *ipIA* null cells with agar containing 1 mM EGTA. (D) Time course  
 663 plot of the mean fluorescence intensity of GCaMP6s in the slug of *PzoA* null cells without  
 664 1 mM EGTA. (E) Box plots of the peak time of  $[\text{Ca}^{2+}]_i$  burst after mechanical stimuli. Lower  
 665 and upper error lines indicate the smallest and largest values, respectively. Average  
 666 values were compared with the peak time of the wild-type slug without EGTA (#). \*,  $p <$   
 667 0.05; \*\*\*,  $p < 0.001$  (Two tailed *t*-test). n.s. indicates no significant difference.
